# Supplementary material
Source: Elsevier journal article supplement (https://www.sciencedirect.com/science/article/pii/S234128791730131X)
Supplement: mmc1 [file S234128791730131X:mmc1.docx]

**Anexo I**

**Gastroenteritis aguda bacteriana: 729 casos reclutados por una red nacional de atención primaria**

Listado de Centinelas y/o coordinadores autonómicos de PAPenRED que han colaborado en la recogida de casos para este estudio (ordenados alfabéticamente):

Beatriz Abad Balaguer, Elia Acitores Suz, Lourdes Aguilera López, María Pilar Aizpurua Galdeano, Manuel Alcaraz Quiñonero, Noelia Álvarez Zallo, Emilio Álvarez Bueno, Trinidad Álvarez de Laviada Mulero, Irene Álvarez González, Montse Amat Bou, María Aparicio Rodrigo, Celina Arana Cañedo-Argüelles, José María Arnal Alonso, Rosa Arranz Sanjuán, Raquel Arroyo Úbeda, María Teresa Asensi Monzo, María Isabel Astiz Blanco, Josep-Vicent Balaguer Martínez, Francesc Bargay Lleonart, Elisa María Barrios González, María Teresa Belda García, María Rosario Benítez Rubio, Albert Bercedo Sanz, María Ángeles Bernabé Moyano, José Vicente Bernad Usoz, Mireia Biosca Pàmies, Luis Carlos Blesa Baviera, Alicia Bonet Garrosa, Isabel María Botana Del Arco, Belén Botella Serrano, Margarita Boullosa Estévez, Juan Bravo Acuña, María Ángeles Caballero Morales, María Teresa Calvo Lorenzo, Dolors Canadell Villaret, María Dolores Cantarero Vallejo, Gemma Capell Redondo, Nayra Carmona Cedrés, Agustín Caro Gómez, Marta Carrera Polanco, Laura Carretero Carretero, María Laura Casado Sánchez, Irene Casares Alonso, Elena Cascón Criado, Antonia Casellas de Asprer, Ángela Casquet Barceló, María Teresa Cerdán Vera, Paloma Chinarro Martínez, Zerezade Coello Torres, Maria del Mar Coto Fuente, Elisa de Frutos Gallego, María Amparo de La Fuente García, Cristina de Las Heras Díaz-Varela, Guadalupe del Castillo Aguas, Inés del Río Pastoriza, Amparo Díaz Sánchez, Olga Díaz Zaera, Begoña Domínguez Aurrecoechea, Yolanda Escanciano García, María Jesús Esparza Olcina, Oscar Espinazo Ramos, Elena Fabregat Ferrer, María Elena Fernández Segura, Miguel Ángel Fernández-Cuesta Valcarce, Beatriz Ferrándiz Cerdá, José Galán Rico, Ana Gallego Iborra, Ana Garach Gómez, Inmaculada García Arroyo, María Luisa García Gestoso, María José García Mérida, Rubén García Pérez, Carmen A García Rebollar, Macarena García Santiago, María García-Onieva Artázcoz, Elisa García-Teresa García, Mercedes Garrido Redondo, Inmaculada Gil Alexandres, Elena Gil Camarero, Mireia Giménez San Andrés, Ana Giner Muñoz, Mercé Giribet Folch, Pilar Gómez Sorrigueta, María Victoria González Cortés, Miriam González Herrero. María Isabel González Marcos, María Paz González Rodríguez, María Amparo Gracia Alfonso, Ana Isabel Grau García, Daniel Gros Esteban, Beatriz Guillot Roselló, Carmelo Gutiérrez Abad, Javier Gutiérrez Blasco, María Dolores Gutiérrez Sigler, José Antonio Heras Galindo, Reyes Hernández Guillén, Paloma Hernando Helguero, Zulema Hernando Zárate, Ainhoa Iturrioz Mata, María Reyes Jaldo Jiménez, Rafael Jiménez Alés, Juan Manuel Jiménez Hereza, Julia Jove Nadal, Blanca Juanes de Toledo, Juan Carlos Juliá Benito, Carlos Labordena Barceló, Gloria Landín Iglesias, Juana María Ledesma Albarrán, Consuelo Lobelle González, Pilar Lobera Navaz, Rosa López Alonso, Maite Arazi López Leibar, Purificación López Vilar, Ana Lorente García-Mauriño , Ada Manero Oteiza, Carmen Mañes Bonet, Ana Marco Puche, Sara Marfil Olink, María Dolores Márquez Moreno, Guillermo Martín Carballo, María Isabel Martín Delgado, Itziar Martín Ibáñez, Luz Marina Martín Martín, Laura Martínez Espligares, José Manuel Martínez Pons, María Victoria Martínez Rubio, Ana Martínez Rubio, Susana Méndez Gallego, Tatiana Menéndez Bada, Nuria Menéndez González, José Mengual Gil, Ramona Mínguez Verdejo, Iciar Miranda Berrioategortua, Isabel Moneo Hernández, Ana María Montañés Sánchez, José Luis Montón Álvarez, Ana Isabel Monzón Bueno, Isabel Mora Gandarillas, María Eulalia Muñoz Hiraldo, Carmen Mustieles Moreno, Guiomar Navarro Cabañas, Carmen Matilde Navas Heredia, Ana Isabel Novo Rodríguez, Fernando Nuño Martín, Ángeles Ordóñez Alonso, Inmaculada Ortells Ramón, María José Palomares Gimeno, Narcisa Palomino Urda, María Belén Panizo Santos, María Rosa Pavo García, Susana Peñarroja Peirats, Marta Pérez de Saracho Taramona, Isabel Pérez García, Joaquín Pérez Gavilán, María Josefa Pérez Serrano, José Antonio Pinilla Fuentes, Silvia Prado Muñoz, Margarita Puncernau Folch, Maribel Quintanilla Sánchez, Rosa María Ramírez Gavira, Sebastián Ramos González, Consuelo Rey del Castillo, Enriqueta Rico Marí, Ana Ripoll Lozano, María Pilar Riveros Huckstadt, Juan Rodríguez Delgado, Amparo Rodríguez Lombardía, Begoña Rodríguez-Moldes Vázquez, Enrique Rodríguez-Salinas Pérez, Carmen Romero Reyes, Adela Rueda Muñoz, Esther Ruiz Chércoles, María Teresa Ruiz Díaz, José Francisco Ruiz Sánchez, Pilar Ruiz-Cuevas García, Ana Sáenz de Urturi Sánchez, Amaia Sáez de Lafuente Arriazu, Miguel Ángel San José González, Felicidad Sanantonio Valdearcos, Elena Sánchez Almeida, Rosa María Sánchez Andrada, Nieves Sánchez Cordero, María Dolores Sánchez Díaz, Manuela Sánchez Echenique, María Carmen Sánchez Jiménez, Juan Manuel Sánchez Lastres, Concepción Sánchez Pina, Silvia Sánchez Precioso, Isabel Sánchez-Prieto Emmanuel, Francisco José Sanchís Morales, Belén Sancho Madrid, Catalina Isabel Servera Ginard, Matilde Somoza Martín, Eva Suárez Vicent, Concepción Surribas Murillo, Isabel Úbeda Sansano, Teresa Valls Durán, María Jesús Vaquerizo Pollino, María Salomé Vega Pérez, Olga Velasco Guijarro, Martín Viar Urieta, Juan José Vigueras Abellán, Margarita Vila Alonso, Gemma Vila Buch, Juan Salvador Vílchez Pérez, Carmen Villaizán Pérez, Arantxa Viudes de Velasco, Susana Viver Gómez
